# Supplementary material for: Chitosan/Virgin-Coconut-Oil-Based System Enriched with Cubosomes: A 3D Drug-Delivery Approach
Source: MDPI journal article supplement (doi:10.3390/md21070394), 2023-07-06
Supplement: s1 [file s1]

## Supplementary information

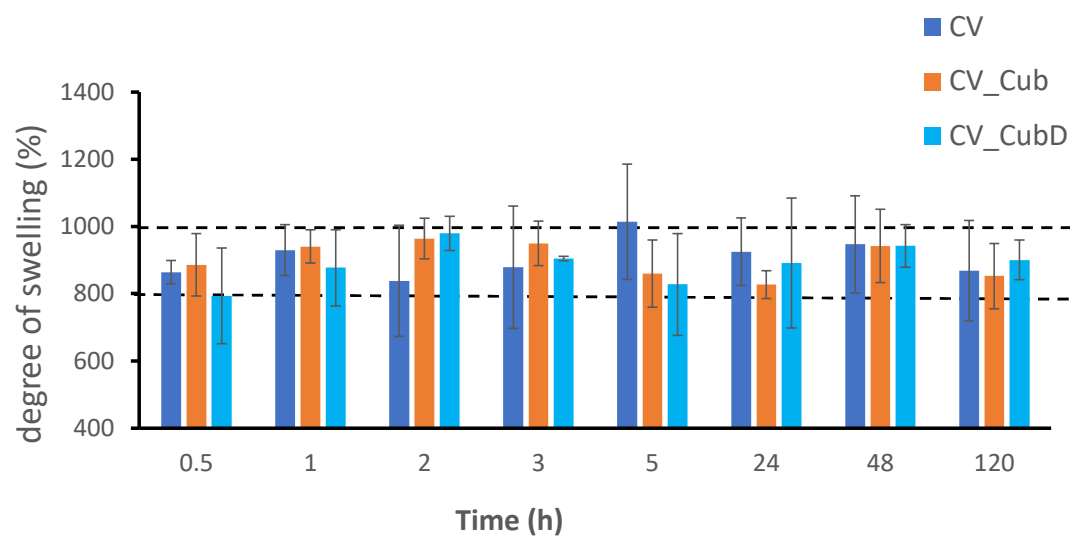

**Figure S1.** Degree of the swelling of the CV-based scaffolds immersed in pH5. The dashed lines meaning the two-maximum degree of swelling for the different formulations for comparison proposes.
